# Supplementary material for: Valuation and Aspirations for Drip Irrigation in Punjab, Pakistan
Source: Atypon-hosted journal article supplement (doi:10.1061/(asce)wr.1943-5452.0001181), 2020-03-28
Supplement: supplemental_data_wr.1943-5452.0001181_bell.pdf [file supplemental_data_wr.1943-5452.0001181_bell.pdf]

## SUPPLEMENTAL DATA

*ASCE Journal of Water Resources Planning and Management*

# Valuation and Aspirations for Drip Irrigation in Punjab, Pakistan

Andrew Reid Bell, Patrick S Ward, Muhammad Ashfaq, and  
Stephen Davies

**DOI:** 10.1061/(ASCE)WR.1943-5452.0001181

© ASCE 2019

[www.ascelibrary.org](http://www.ascelibrary.org)

**Table S1. Descriptive statistics of sample households, by district.**

|                       |                                              | Attock<br>(Barani; n = 158) |           | Chakwal<br>(Barani; n = 65) |           | Layyah<br>(Sandy Desert<br>B; n = 86) |           | Sahiwal<br>(Northern<br>Irrigated Plain; n<br>= 131) |           |
|-----------------------|----------------------------------------------|-----------------------------|-----------|-----------------------------|-----------|---------------------------------------|-----------|------------------------------------------------------|-----------|
|                       |                                              | <i>Mean</i>                 | <i>SD</i> | <i>Mean</i>                 | <i>SD</i> | <i>Mean</i>                           | <i>SD</i> | <i>Mean</i>                                          | <i>SD</i> |
| Household Information | Age                                          | 43.08                       | 11.89     | 42.66                       | 10.16     | 45.33                                 | 12.38     | 50.68                                                | 11.71     |
|                       | Female Respondent                            | 0.0063                      | 0.0793    | 0.0125                      | 0.112     | 0                                     | 0         | 0.0214                                               | 0.145     |
|                       | Years Formal<br>Education                    | 8.78                        | 5.05      | 8.062                       | 6.719     | 8.979                                 | 5.687     | 9.9                                                  | 4.886     |
|                       | Literacy (0: No; 1:<br>Somewhat; 2: Yes)     | 0.849                       | 0.836     | 1.075                       | 0.925     | 1.052                                 | 0.838     | 1.207                                                | 0.835     |
|                       | Female HH Members                            | 1.491                       | 1.043     | 2.25                        | 1.471     | 2.438                                 | 1.568     | 2.579                                                | 1.573     |
|                       | Male HH Members                              | 2.226                       | 1.031     | 2.462                       | 1.35      | 2.76                                  | 1.229     | 3.271                                                | 1.822     |
|                       | Farm Holdings (Acres)                        | 11.73                       | 27.18     | 8.859                       | 12.09     | 19.09                                 | 21.19     | 18.61                                                | 27.8      |
| Cropping Patterns     | Plant Cereals                                | 0.601                       | 0.491     | 0.605                       | 0.492     | 0.649                                 | 0.48      | 0.899                                                | 0.303     |
|                       | Plant<br>Vegetables/Melons                   | 0.0127                      | 0.112     | 0.158                       | 0.367     | 0                                     | 0         | 0.00725                                              | 0.0851    |
|                       | Plant Fruit and Nuts                         | 0.456                       | 0.5       | 0.421                       | 0.497     | 0.457                                 | 0.501     | 0.029                                                | 0.168     |
|                       | Plant Oilseeds                               | 0                           | 0         | 0                           | 0         | 0.0319                                | 0.177     | 0.0725                                               | 0.26      |
|                       | Plant Roots and Tubers                       | 0.0063                      | 0.0796    | 0                           | 0         | 0                                     | 0         | 0.13                                                 | 0.338     |
|                       | Plant Beverage and<br>Spice Crops            | 0.0063                      | 0.0796    | 0                           | 0         | 0.0106                                | 0.103     | 0.0145                                               | 0.12      |
|                       | Plant Legumes                                | 0                           | 0         | 0.0263                      | 0.161     | 0.149                                 | 0.358     | 0.0217                                               | 0.146     |
|                       | Plant Sugar Crops                            | 0                           | 0         | 0                           | 0         | 0.0213                                | 0.145     | 0.00725                                              | 0.0851    |
|                       | Plant Fiber Crops                            | 0                           | 0         | 0                           | 0         | 0.415                                 | 0.495     | 0.543                                                | 0.5       |
| Plant Other Crops     | 0.0127                                       | 0.112                       | 0.0132    | 0.115                       | 0.255     | 0.438                                 | 0.435     | 0.498                                                |           |
| Constraints           | Had to fallow fields<br>due to lack of water | 0.459                       | 0.5       | 0.338                       | 0.476     | 0.146                                 | 0.355     | 0.0643                                               | 0.246     |

|                        |                                                               |       |       |       |       |        |       |        |       |
|------------------------|---------------------------------------------------------------|-------|-------|-------|-------|--------|-------|--------|-------|
|                        | Avoided drip irrigation due to cost or electricity constraint | 0.333 | 0.473 | 0.3   | 0.461 | 0.385  | 0.489 | 0.529  | 0.501 |
| Water Characteristics  | Use canal water                                               | 0     | 0     | 0     | 0     | 0.167  | 0.375 | 0.671  | 0.471 |
|                        | Use rainwater                                                 | 0.491 | 0.501 | 0.65  | 0.48  | 0.0521 | 0.223 | 0      | 0     |
|                        | Use well                                                      | 0.371 | 0.485 | 0     | 0     | 0.417  | 0.496 | 0.243  | 0.43  |
|                        | Use borehole                                                  | 0.264 | 0.442 | 0.325 | 0.471 | 0.406  | 0.494 | 0.0786 | 0.27  |
|                        | Annual groundwater spending (Rs. 100,000)                     | 1.497 | 2.739 | 0.613 | 1.123 | 2.316  | 2.203 | 2.097  | 3.877 |
| Drip System Experience | Non-users                                                     | 0.52  | 0.50  | 0.50  | 0.50  | 0.63   | 0.49  | 0.92   | 0.27  |
|                        | New users                                                     | 0.35  | 0.48  | 0.29  | 0.46  | 0.17   | 0.37  | 0.07   | 0.26  |
|                        | Old users                                                     | 0.14  | 0.35  | 0.21  | 0.41  | 0.21   | 0.41  | 0.01   | 0.08  |

**Table S2. Experiences with and perceptions of drip irrigation systems**

| System characteristic                       | Current drip Users |                    | Current non-users |                    | t-test p-value      | KS test p-value      |
|---------------------------------------------|--------------------|--------------------|-------------------|--------------------|---------------------|----------------------|
|                                             | Mean               | Standard deviation | Mean              | Standard deviation |                     |                      |
| Gross installation costs (per acre)         | 121,162.40         | 86,788.94          | 146,194.50        | 91,591.37          | 0.002               | 2.63e <sup>-10</sup> |
| Subsidy (per acre)                          | 77,208.27          | 79,511.63          | 71,889.07         | 50,741.96          | 0.188               | 0.004                |
| Technical/knowledge support offered (years) | 1.38               | 0.58               | 1.10              | 0.67               | 3.87e <sup>-6</sup> | 3.61e <sup>-4</sup>  |
| Maintenance support offered (years)         | 1.29               | 0.65               | 1.07              | 0.68               | 0.001               | 8.86e <sup>-4</sup>  |

**Table S3. Percentage of farmers currently growing various crops.**

|                 | Cereals | Vegetables and Melons | Fruits and Nuts | Oilseeds | Roots and Tubers | Beverage and Spice | Legume | Sugarcane | Fiber Crops | Other Crops |
|-----------------|---------|-----------------------|-----------------|----------|------------------|--------------------|--------|-----------|-------------|-------------|
| Attock (n=158)  | 0.601   | 0.013                 | 0.456           | 0        | 0.006            | 0.006              | 0      | 0         | 0           | 0.013       |
| Chakwal (n=65)  | 0.677   | 0.046                 | 0.492           | 0        | 0                | 0                  | 0      | 0         | 0           | 0.015       |
| Layyah (n=86)   | 0.663   | 0                     | 0.500           | 0        | 0                | 0                  | 0.105  | 0.023     | 0.430       | 0.279       |
| Sahiwal (n=131) | 0.908   | 0                     | 0.031           | 0.061    | 0.107            | 0.008              | 0.015  | 0.008     | 0.550       | 0.450       |
| Total           | 0.716   | 0.011                 | 0.343           | 0.018    | 0.034            | 0.005              | 0.025  | 0.007     | 0.248       | 0.195       |

**Table S4 Percentage of farmers indicating aspirations to increase cultivation of various crops.**

|                 | Cereals | Vegetables and Melons | Fruits and Nuts | Oilseeds | Roots and Tubers | Beverage and Spice | Legume | Sugarcane | Fiber Crops | Other Crops |
|-----------------|---------|-----------------------|-----------------|----------|------------------|--------------------|--------|-----------|-------------|-------------|
| Attock (n=158)  | 0.032   | 0.013                 | 0.620           | 0.006    | 0                | 0.063              | 0      | 0         | 0           | 0           |
| Chakwal (n=65)  | 0.046   | 0.185                 | 0.508           | 0.015    | 0                | 0                  | 0      | 0         | 0           | 0           |
| Layyah (n=86)   | 0.012   | 0.105                 | 0.407           | 0.093    | 0                | 0.128              | 0.012  | 0         | 0.023       | 0           |
| Sahiwal (n=131) | 0.366   | 0.321                 | 0.038           | 0.153    | 0.137            | 0.458              | 0.160  | 0         | 0.008       | 0           |
| Total           | 0.130   | 0.148                 | 0.389           | 0.068    | 0.041            | 0.184              | 0.050  | 0         | 0.007       | 0           |

**Table S5. Percentage of farmers indicating an aspiration to reduce cultivation of various crops.**

|                 | Cereals | Vegetables and Melons | Fruits and Nuts | Oilseeds | Roots and Tubers | Beverage and Spice | Legume | Sugarcane | Fiber Crops | Other Crops |
|-----------------|---------|-----------------------|-----------------|----------|------------------|--------------------|--------|-----------|-------------|-------------|
| Attock (n=158)  | 0.089   | 0                     | 0.006           | 0        | 0                | 0                  | 0      | 0         | 0           | 0           |
| Chakwal (n=65)  | 0.031   | 0                     | 0               | 0        | 0                | 0                  | 0      | 0         | 0           | 0           |
| Layyah (n=86)   | 0.023   | 0                     | 0               | 0        | 0                | 0                  | 0      | 0         | 0           | 0           |
| Sahiwal (n=131) | 0.275   | 0                     | 0               | 0        | 0.008            | 0                  | 0      | 0         | 0.038       | 0           |
| Total           | 0.123   | 0                     | 0.002           | 0        | 0.002            | 0                  | 0      | 0         | 0.011       | 0           |

**Table S6. Proportion of sample farmers reporting different agricultural aspirations across any two choice scenarios**

|          | Choice 1 | Choice 2 | Choice 3 | Choice 4 | Choice 5 |
|----------|----------|----------|----------|----------|----------|
| Choice 1 |          |          |          |          |          |
| Choice 2 | 0.198    |          |          |          |          |
| Choice 3 | 0.222    | 0.195    |          |          |          |
| Choice 4 | 0.235    | 0.200    | 0.214    |          |          |
| Choice 5 | 0.248    | 0.212    | 0.197    | 0.202    |          |
| Choice 6 | 0.206    | 0.203    | 0.193    | 0.187    | 0.159    |



**Table S7. Correlates with estimated conditional marginal utilities**

|                    | (1A)             | (1B)             | (2A)               | (2B)               | (3A)         | (3B)         | (4A)                   | (4B)                   | (5A)                 | (5B)                 |
|--------------------|------------------|------------------|--------------------|--------------------|--------------|--------------|------------------------|------------------------|----------------------|----------------------|
| VARIABLES          | MU coverage area | MU coverage area | MU Cost (negative) | MU Cost (negative) | MU subsidy   | MU subsidy   | MU maintenance support | MU maintenance support | MU knowledge support | MU knowledge support |
| Constant           | -0.132           | -0.214           | -<br>3.662*<br>**  | -<br>3.952*<br>**  | 3.377*<br>** | 3.447*<br>** | 0.150                  | 0.140                  | 0.506*<br>**         | 0.588*<br>**         |
| Non-user x Attock  | -<br>0.029<br>5  | -<br>0.0574      | -<br>0.0079<br>1   | -<br>0.0107        | 0.0022<br>2  | -<br>0.0318  | 0.180**                | 0.192**                | -0.0283              | -0.0780              |
| New user x Attock  | 0.155            | 0.0516           | -<br>0.0650        | -<br>0.0947        | 0.0619       | -<br>0.0127  | 0.117                  | 0.0888                 | -0.0728              | -0.119               |
| Old user x Attock  | 0.349<br>***     | 0.229*<br>*      | 1.403*<br>**       | 1.329*<br>**       | -0.249       | -0.323       | 0.139                  | 0.115                  | -<br>0.198*<br>*     | -<br>0.256*<br>**    |
| Non user x Chakwal | 0.032            | 0.015            | 0.276              | 0.312              | 0.315*       | 0.293        | -0.0613                | -0.0655                | -0.110               | -0.154               |
| New user x Chakwal | 0.550<br>***     | 0.456*<br>**     | 1.747*<br>**       | 1.892*<br>**       | 0.818*<br>** | 0.640*<br>** | 0.0889                 | 0.0329                 | -0.112               | -0.117               |
| Old user x Chakwal | 0.483<br>***     | 0.297*<br>**     | 1.382*<br>**       | 1.297*<br>**       | 0.415        | 0.210        | 0.151                  | 0.103                  | -0.0887              | -0.106               |
| Non user x Layyah  | -<br>0.171<br>** | -<br>0.188*<br>* | -<br>0.709*<br>*   | -<br>0.659*<br>*   | 0.161        | 0.146        | 0.0105                 | -0.0334                | 0.154*<br>*          | 0.118*               |
| New user x Layyah  | 0.438<br>***     | 0.347*<br>**     | 0.997*<br>*        | 0.926*<br>*        | 0.742*<br>** | 0.706*<br>** | 0.0834                 | 0.0272                 | -0.0667              | -0.0946              |
| Old user x Layyah  | 0.231<br>**      | 0.107            | 0.561              | 0.458              | -0.151       | 0.0740       | 0.153*                 | 0.0744                 | 0.111                | 0.0967               |

|                                                    |                  |              |             |              |                  |                  |         |                   |              |         |
|----------------------------------------------------|------------------|--------------|-------------|--------------|------------------|------------------|---------|-------------------|--------------|---------|
| Cereals                                            | 0.007<br>26      |              | -<br>0.0555 |              | 0.231*<br>*      |                  | 0.0240  |                   | 0.130*<br>** |         |
| Vegetables and melons                              | -<br>0.090<br>5  |              | 0.335       |              | -<br>0.470*<br>* |                  | -0.0994 |                   | 0.111        |         |
| Fruits and nuts                                    | -0.121           |              | -0.101      |              | -<br>0.0205      |                  | -0.0130 |                   | 0.0474       |         |
| Oilseeds                                           | 0.107            |              | 0.537       |              | 0.258            |                  | 0.104   |                   | -0.0246      |         |
| Fiber crops                                        | -<br>0.134<br>** |              | -0.321      |              | -<br>0.240*<br>* |                  | -0.0419 |                   | -0.0430      |         |
| Would grow more cereals                            |                  | 0.237*<br>** |             | 0.798*<br>** |                  | 0.138            |         | -<br>0.162**<br>* |              | 0.108*  |
| Would grow more vegetables and melons              |                  | 0.0979<br>*  |             | 0.0585       |                  | 0.159            |         | 0.0379            |              | -0.0663 |
| Would grow more fruits and nuts                    |                  | 0.261*<br>** |             | 0.514*<br>** |                  | 0.160*<br>*      |         | -0.00634          |              | 0.0251  |
| Would grow more oilseeds                           |                  | 0.0230       |             | 0.226        |                  | -<br>0.454*<br>* |         | 0.131*            |              | -0.0549 |
| Would substitute vegetables and melons for cereals |                  | -<br>0.0305  |             | -0.406       |                  | 0.279            |         | -<br>0.272**<br>* |              | 0.0475  |
| Would substitute fruits and nuts for cereals       |                  | -<br>0.0378  |             | -0.106       |                  | 0.339*<br>*      |         | -0.0801           |              | 0.0261  |
| Would substitute oilseeds for cereals              |                  | 0.0138       |             | -0.739       |                  | 0.955*<br>**     |         | -0.126            |              | 0.0637  |

|                                                              |          |          |          |         |         |         |          |           |          |          |
|--------------------------------------------------------------|----------|----------|----------|---------|---------|---------|----------|-----------|----------|----------|
| Would substitute beverages and spices for cereals            |          | 0.112    |          | 0.333   |         | 0.442** |          | 0.00479   |          | -0.234** |
| Land fallowed because of dry conditions                      | 0.0928*  | 0.0884*  | 0.309*   | 0.334*  | 0.222*  | 0.170*  | -0.00730 | -0.0194   | 0.0343   | 0.0252   |
| Irrigation limited because of cost or unreliable electricity | 0.208*** | 0.133**  | 0.630**  | 0.457** | 0.273** | 0.221** | 0.0836*  | 0.0936*   | -0.00819 | -0.00395 |
| Water source: canal                                          | 0.115    | 0.104    | 0.653*   | 0.578*  | 0.248   | 0.281*  | 0.0714   | 0.115*    | -0.154*  | -0.155*  |
| Water source: rainfed                                        | -0.168** | -0.148*  | -0.301   | -0.303  | -0.120  | 0.0355  | -0.0204  | -0.00261  | -0.154*  | -0.0867  |
| Water source: tubewell                                       | 0.0681   | 0.0677   | 0.654*   | 0.660*  | 0.0314  | 0.0744  | 0.125*   | 0.135*    | -0.197** | -0.153*  |
| Water source: borehole                                       | 0.108    | 0.128*   | 0.545*   | 0.581*  | 0.245   | 0.310*  | -0.0207  | -0.0107   | -0.140*  | -0.0905  |
| Groundwater cost                                             | -0.0006  | -0.00631 | -0.00335 | -0.0108 | 0.0301  | 0.0226  | -0.00332 | -0.000334 | 0.00598  | 0.00458  |
| Demographic controls                                         | Yes      | Yes      | Yes      | Yes     | Yes     | Yes     | Yes      | Yes       | Yes      | Yes      |
| Observations                                                 | 465      | 465      | 465      | 465     | 465     | 465     | 465      | 465       | 465      | 465      |
| R-squared                                                    | 0.220    | 0.292    | 0.179    | 0.220   | 0.248   | 0.271   | 0.112    | 0.141     | 0.106    | 0.107    |
| AIC                                                          | 440.4    | 401      | 1673     | 1655    | 1018    | 1009    | 308.5    | 299.3     | 379.8    | 385.5    |
| BIC                                                          | 564.7    | 537.7    | 1797     | 1792    | 1142    | 1146    | 432.8    | 436       | 504.1    | 522.2    |

Notes: \*\*\* significant with 1 percent probability of Type I error; \*\* significant with 5 percent probability of Type I error; \* significant with 10 percent probability of Type I error. Standard errors adjusted for clustering at the district level.

Table S8: P-values for Wald tests of differences in regression coefficients for drip experience, by district.

|                |                     | <b>Coverage</b>         | <b>Cost</b>             | <b>Subsidy</b>          | <b>Maintenance Support</b> | <b>Knowledge Support</b> |
|----------------|---------------------|-------------------------|-------------------------|-------------------------|----------------------------|--------------------------|
| <b>Attock</b>  | <i>Non- and New</i> | Same (p = 0.1822)       | Same (p = 0.7724)       | Same (p = 0.8939)       | Same (p = 0.184)           | Same (p = 0.6256)        |
|                | <i>Non- and Old</i> | Increasing (p = 0.0058) | Increasing (p = 0.0036) | Same (p = 0.2194)       | Same (p = 0.4607)          | Decreasing (p = 0.0146)  |
|                | <i>New and Old</i>  | Same (p = 0.0577)       | Increasing (p = 0.0012) | Same (p = 0.2094)       | Same (p = 0.7946)          | Same (p = 0.1204)        |
| <b>Chakwal</b> | <i>Non- and New</i> | Increasing (p = 0)      | Increasing (p = 0)      | Increasing (p = 0.0442) | Same (p = 0.4371)          | Same (p = 0.7163)        |
|                | <i>Non- and Old</i> | Increasing (p = 0.0101) | Increasing (p = 0.0095) | Same (p = 0.7988)       | Same (p = 0.1091)          | Same (p = 0.6836)        |
|                | <i>New and Old</i>  | Same (p = 0.0784)       | Same (p = 0.0559)       | Same (p = 0.117)        | Same (p = 0.5191)          | Same (p = 0.9096)        |
| <b>Layyah</b>  | <i>Non- and New</i> | Increasing (p = 0)      | Increasing (p = 0.0003) | Increasing (p = 0.0106) | Same (p = 0.5344)          | Decreasing (p = 0.0185)  |
|                | <i>Non- and Old</i> | Increasing (p = 0.0061) | Increasing (p = 0.014)  | Same (p = 0.2149)       | Same (p = 0.1267)          | Same (p = 0.8826)        |
|                | <i>New and Old</i>  | Decreasing (p = 0.0334) | Same (p = 0.3069)       | Decreasing (p = 0.0016) | Same (p = 0.6289)          | Same (p = 0.1163)        |
